# Supplementary material for: Vitamin D and Bone: A Story of Endocrine and Auto/Paracrine Action in Osteoblasts
Source: MDPI journal article supplement (doi:10.3390/nu15030480), 2023-01-17
Supplement: s1 [file s1]

**Figure S1: Literature search strategy performed October 2022**

| Data base searched | Years of coverage | Records     | Records after duplicates removed |
|--------------------|-------------------|-------------|----------------------------------|
| Medline ALL Ovid   | 2016 - present    | 2067        | 2060                             |
| Embase.com         | 2016 - present    | 2185        | 653                              |
| <b>Total</b>       |                   | <b>4252</b> | <b>2713</b>                      |
| Excluded           |                   |             | 2583                             |
| Included           |                   |             | <b>128</b>                       |
| Retracted          |                   |             | 2                                |

**Medline ALL Ovid 2067**

(\* exp Vitamin D / OR \* Calcitriol / OR \* Receptors, Calcitriol / OR \* Vitamin D Deficiency / OR \* Vitamin D-Binding Protein / OR (((vitamin\* OR hydroxyvitamin\* OR dihydroxyvitamin\*) ADJ (D OR D3)) OR colecalciferol\* OR cholecalciferol\* OR ergocalciferol\* OR Calcitriol\*).ti.) AND (\* exp "Bone and Bones" / OR Osteoblasts/ OR Osteocytes/ OR Osteoclasts/ OR Fibroblast Growth Factors / OR Extracellular Matrix / OR exp Bone Diseases/ OR Hypercalcemia / OR Receptors, Fibroblast Growth Factor / OR Calcification, Physiologic / OR (bone OR bones OR skeleton\* OR skeletal\* OR fibroblast-growth-factor\* OR extracellular-matri\* OR extra-cellular-matri\* OR Mineralizat\* OR Mineralisat\* OR demineralizat\* OR demineralisat\* OR Osteoblast\* OR Osteoclast\* OR Osteocyt\* OR Fracture\* OR FGF23 OR hypercalcemi\* OR hypercalcaemi\* OR (disc ADJ3 degenerat\*) OR craniosteno\* OR scolios\* OR Osteoarthritis\* OR spondyloarthritis\* OR spondylarthritis\* OR coxarthrit\* OR gonarthrit\* OR calcificat\* OR Osteoporos\* OR ricket\* OR (ankylosing ADJ3 spondylitis) OR arthritis OR acromegal\*).ti.) AND (2016 OR 2017 OR 2018 OR 2019 OR 2020 OR 2021 OR 2022 OR 2023).yr. NOT (letter\* OR news OR comment\* OR editorial\* OR congres\* OR abstract\* OR book\* OR chapter\* OR dissertation abstract\*).pt. AND english.la. NOT (exp animals/ NOT humans/)

**Embase.com 2185**

('vitamin D'/exp/mj OR 'vitamin D receptor'/exp/mj OR 'vitamin D deficiency'/exp/mj OR 'vitamin D binding protein'/de/mj OR 'vitamin d supplementation'/de/mj OR (((vitamin\* OR hydroxyvitamin\* OR dihydroxyvitamin\*) NEXT/1 (D OR D3)) OR colecalciferol\* OR cholecalciferol\* OR ergocalciferol\* OR Calcitriol):ti) AND (bone/mj/exp OR 'bone cell'/mj/exp OR 'bone tissue'/mj/exp OR 'bone injury'/mj/exp OR 'fibroblast growth factor'/mj/exp OR 'extracellular matrix'/mj/exp OR 'bone metabolism'/mj/exp OR 'calcium bone level'/mj/de OR 'bone microarchitecture'/mj/exp OR 'bone malformation'/mj/exp OR 'bone disease'/mj/exp OR hypercalcemia/mj OR 'fibroblast growth factor receptor'/mj OR 'bone disease'/exp/mj OR calcification/mj OR (bone OR bones OR skeleton\* OR skeletal\* OR fibroblast-growth-factor\* OR extracellular-matri\* OR extra-cellular-matri\* OR Mineralizat\* OR Mineralisat\* OR demineralizat\* OR demineralisat\* OR Osteoblast\* OR Osteoclast\* OR Osteocyt\* OR Fracture\* OR FGF23 OR hypercalcemi\* OR hypercalcaemi\* OR (disc NEAR/3 degenerat\*) OR craniosteno\* OR scolios\* OR Osteoarthritis\* OR spondyloarthritis\* OR spondylarthritis\* OR coxarthrit\* OR gonarthrit\* OR calcificat\* OR Osteoporos\* OR ricket\* OR (ankylosing NEAR/3 spondylitis) OR arthritis OR acromegal\*):ti) AND [2016-2023]/py NOT ([Conference Abstract]/lim OR [Letter]/lim OR [Note]/lim OR [Editorial]/lim) AND [english]/lim NOT ([animals]/lim NOT [humans]/lim)
